# Supplementary material
Source: PubMed Central journal article supplement (PMC5561347)
Supplement: npp201780x1.pdf [file npp201780x1.pdf]

**Figure S1**

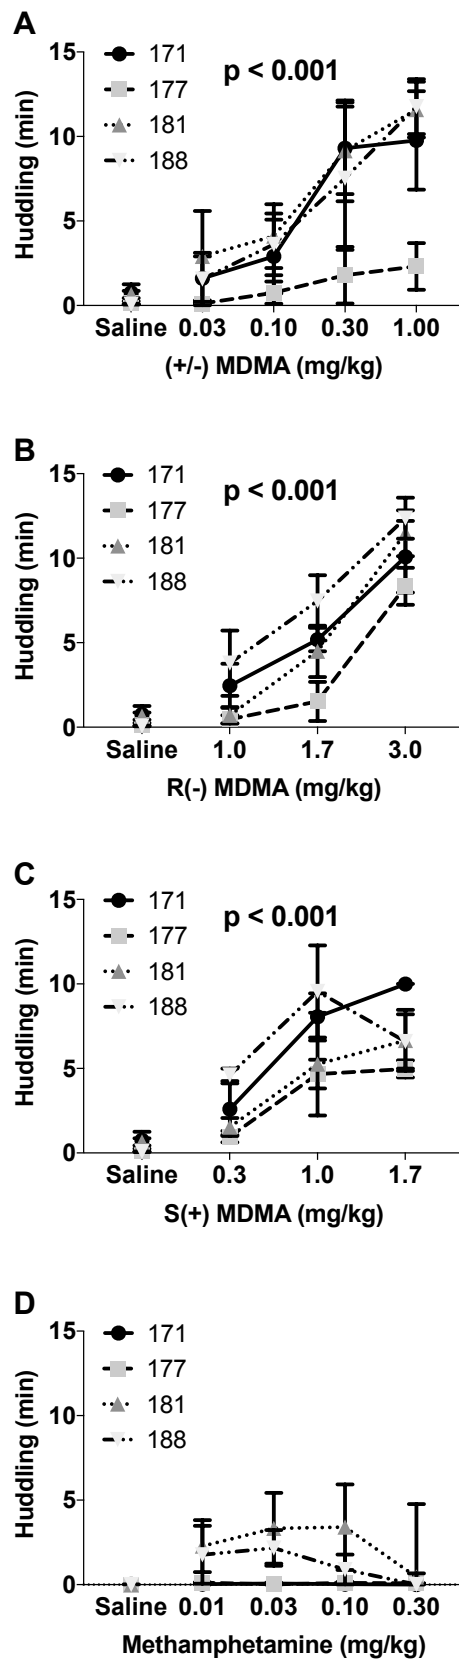

**Figure S1: MDMA, but not methamphetamine, increase huddling.** Average time (in minutes) spent huddling during one-hour observations following drug administration. Averages for each animal are shown. Number of sessions was between 3 and 5 for each dose. Error bars represent SEM for variation across sessions.
