# Supplementary material
Source: PubMed Central journal article supplement (PMC5561347)
Supplement: npp201780x2.pdf [file npp201780x2.pdf]

## Figure S2

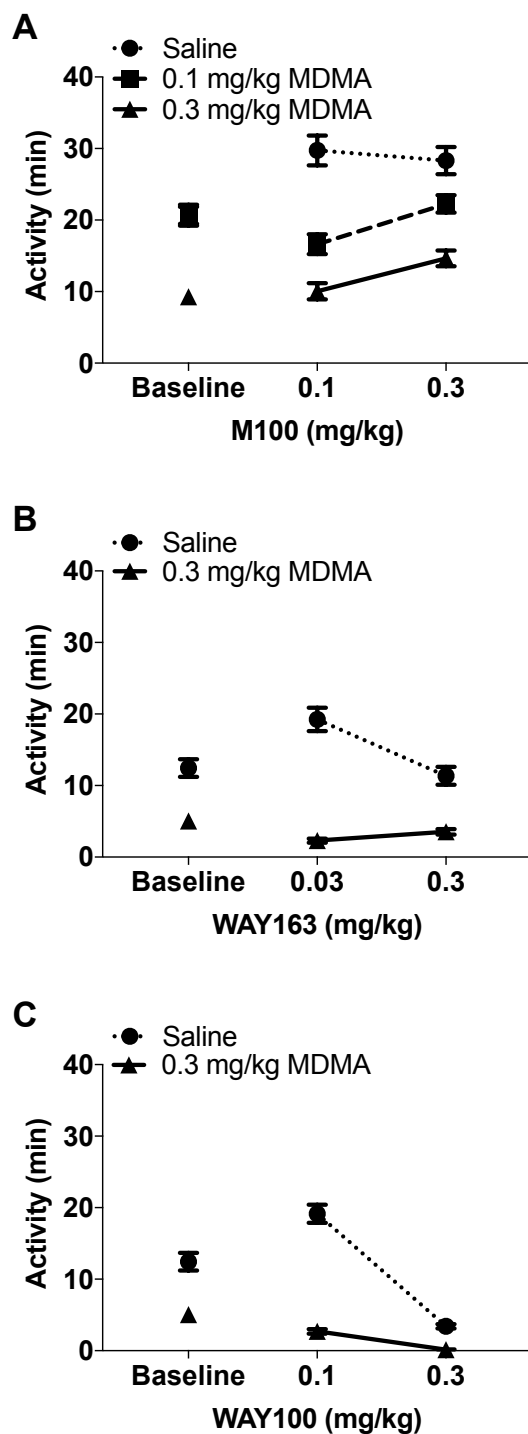

**Figure S2: 5-HT receptor antagonists effects on MDMA-induced changes in activity.** Average time (in minutes) in activity during one-hour following drug administration. M100907 (M100) is a selective 5-HT<sub>2A</sub> receptor antagonist (A). WAY163909 (WAY163) is a selective 5-HT<sub>2C</sub> receptor agonist (B). WAY100635 (WAY100) is a selective 5-HT<sub>1A</sub> receptor antagonist (C). Number of sessions was between 3 and 5 for each dose. Error bars represent SEM for variation across subjects.
