# Supplementary material
Source: PubMed Central journal article supplement (PMC5561347)
Supplement: npp201780x3.pdf [file npp201780x3.pdf]

### Figure S3

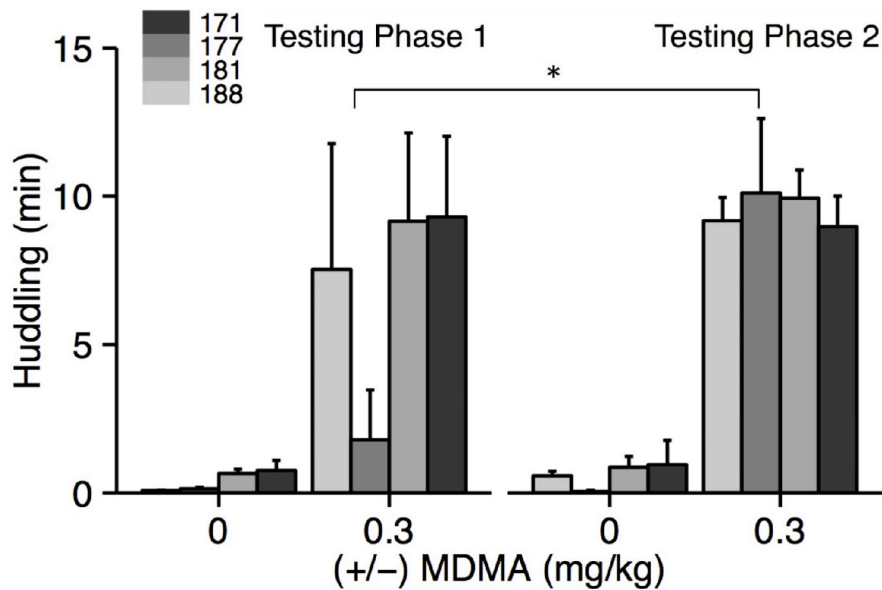

**Figure S3: Multiple MDMA exposures increases MDMA-induced huddling in a low response subject.** One subject (177) initially showed very little change in huddling behavior following MDMA-administration. Repeated administration of MDMA increased MDMA-induced huddling in this monkey, but did not change huddling rates in the other 3 subjects. Average time (in minutes) spent huddling during one-hour observations following drug administration. Number of sessions was between 3 and 5 for each dose. Error bars represent SEM for variation across sessions.
