# Supplementary material
Source: PubMed Central journal article supplement (PMC5561347)
Supplement: npp201780x4.pdf [file npp201780x4.pdf]

# Figure S4

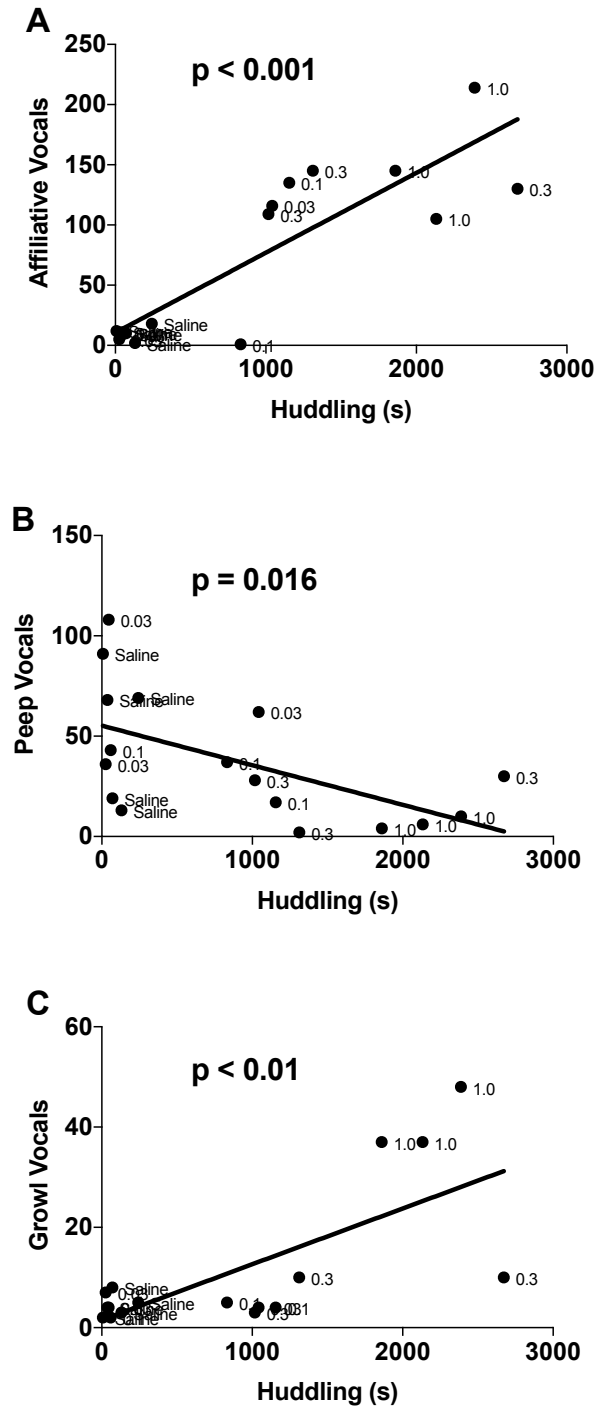

**Figure S4: Huddling is positively correlated with affiliative calls and growls, but negatively correlated with peeps.** Correlation between the total amount of huddling and the number of affiliative calls (A), peeps (B), and growls (C). Pearson product-moment correlations were calculated for the duration of huddling and the number of the vocalization for each of the three call categories. As the amount of huddling increased there was also an increase in the number of affiliative vocalizations, with a significant positive correlation between the two measures of affiliative social behaviors ( $r=0.869$ ,  $p<0.001$ ). In contrast, the amount of huddling was negatively correlated to the number of peeps emitted during a session ( $r=-0.573$ ,  $p=0.016$ ). The number of growls and amount of huddling were positively correlated ( $r=0.711$ ,  $p<0.01$ ). Each data point is the amount of group huddling and calls during a single session. Dose of MDMA (mg/kg) administered in each session is above each data point. Number of sessions was between 3 and 5 for each dose.
